# Supplementary material for: Assessing Microbial Water Quality, Users' Perceptions and System Functionality Following a Combined Water Safety Intervention in Rural Nepal
Source: Frontiers journal article supplement (doi:10.3389/frwa.2021.750802), 2022-02-15
Supplement: Data_Sheet_1.pdf [file Data_Sheet_1.pdf]

# Assessing microbial water quality, users' perceptions and system functionality following a combined water safety intervention in rural Nepal

## *Supplemental Materials*

**Carola Bänziger<sup>1\*†</sup>, Ariane Schertenleib<sup>1</sup>, Bal Mukunda Kunwar<sup>2</sup>, Madan R. Bhatta<sup>2</sup>, Sara J. Marks<sup>1</sup>**

<sup>1</sup> EAWAG, Swiss Federal Institute of Aquatic Science and Technology, Dübendorf, Switzerland

<sup>2</sup> Helvetas Swiss Intercooperation, Kathmandu, Nepal

<sup>†</sup> Present address: FHNW, University of Applied Sciences Northwestern Switzerland, Muttenz, Switzerland

### **\* Correspondence:**

Carola Bänziger

carola.baenziger@fhnw.ch

## 1 Supplementary Data

### Microbial quality of chlorinated water systems

System-chlorination improved microbial water quality at the point of consumption among households where chlorine was measured (see **Figure 4**). Amongst all treatment systems in which chlorination was intended but undetected, *E. coli* contamination was not significantly different from the treatment systems without planned chlorination. However, a significant difference in the *E. coli* concentration was observed from baseline to endline at the point of consumption amongst the households where free residual chlorine was measured. There, the *E. coli* concentration was significantly lower at endline than at baseline.

Chlorination improved microbial water quality significantly although in many systems where chlorination was intended, it was not carried out on a regular basis as indicated by a lack of detectable residual chlorine and stated through key informant interviews. In a total of 6 systems (minimum 1 per district), chlorination was planned regularly. However, only in 11% of the households in the systems where chlorination was intended there was actually measurable chlorine concentration at the point of consumption at the time of endline data collection. These 19 households belonged to two systems. The measured chlorine level varied between 0.1 and 1.5 mg Cl/L (M= 0.5, SD= 0.6). In 9 of these 19 water samples, we measured 0.1 mg Cl/L, the others ranged from 0.2 – 1.5 mg Cl/L within the recommended dosing range of 0.2 - 5.0 mg/L for disinfection efficacy (WHO, 2011). These 10 households had non-detectable *E. coli* concentrations except for one with 1.5 mg Cl/L, which showed 1 *E. coli* CFU/100 mL. Six of the households with 0.1 mg Cl/L had <1 *E. coli* CFU/100 mL at endline, one had 1 *E. coli* CFU/100 mL another had 15 *E. coli* CFU/100 mL, and for one the *E. coli* concentration was too numerous to count (TNTC).

Reference:

WHO, 2011. *Guidelines for Drinking-water Quality, 4th Edition*. World Health Organization, Geneva, Switzerland.

### Associations between users' perceptions of their water service and system functionality metrics

There was a significant correlation between the functionality of the main drinking water source (functioning well, functioning not so well, not functioning) and the user's satisfaction (satisfied, dissatisfied, extremely dissatisfied). Better functioning sources were associated with the availability of the source when needed, and both were associated with higher users' satisfaction. Further, more hours of reported water availability were associated with higher rated source functionality at present and both were associated with higher confidence that the water system would be functional one year later.

The interruption in the water system within the last year during which no water was available for more than one week correlated negatively with the hours of water available per day at the tap, the current functionality and the confidence in a functional system one year later. So, more hours of water availability, better rated current functionality and higher confidence in the functionality after one year were associated with less interruptions. Further, interruptions correlated with lower user satisfaction with the water system. All Spearman's correlations presented were of moderate strength with p-values < .02. (More details on the correlation are in Table S8.)

## Abbreviations

|                |                                                           |
|----------------|-----------------------------------------------------------|
| CFU            | colony forming units                                      |
| DPD            | N,N-Diethyl-p-phenylendiamin                              |
| DWS            | drinking water scheme                                     |
| <i>E. coli</i> | <i>Escherichia coli</i>                                   |
| Eawag          | Swiss Federal Institute of Aquatic Science and Technology |
| FCHV           | Female community health volunteer                         |
| FRC            | free residual chlorine                                    |
| HWTS           | household water treatment and safe storage                |
| IWRM           | Integrated Water Resource Management                      |
| M              | Mean                                                      |
| N              | sample size                                               |
| NGO            | non-governmental organization                             |
| NPR            | Nepalese Rupee                                            |
| OR             | odds ratio                                                |
| SD             | standard deviation                                        |
| SDG            | Sustainable Development Goal                              |
| TNTC           | too numerous to count                                     |
| USD            | United States Dollar                                      |
| VMW            | village maintenance worker                                |
| WASH           | water, sanitation and hygiene                             |
| WHO            | World Health Organization                                 |
| WSP            | water safety plan                                         |
| WUSC           | water users' committee                                    |

## Supplementary Figures and Tables

### 1.1 Supplementary Figures

**Figure S1:** 5-dot scale used for perception and ownership questions during the household and key informant interviews.

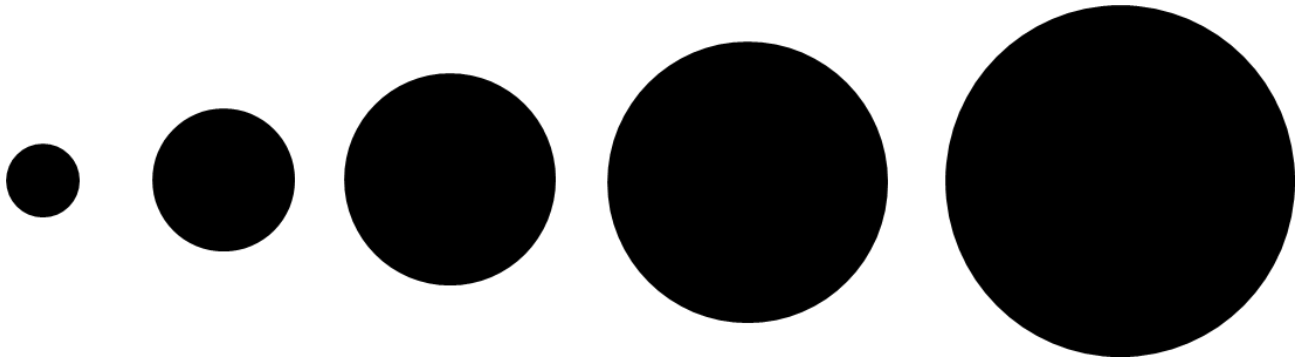

## 1.2 Supplementary tables

**Table S1:** Households' characteristics from all households reported at endline.

|                                     | N   | Min. | Max.   | Median | Mean  | SD    |
|-------------------------------------|-----|------|--------|--------|-------|-------|
| Respondent age (years)              | 487 | 14   | 88     | 36     | 38.4  | 14.2  |
| People in household                 | 487 | 1    | 18     | 6      | 6.4   | 2.5   |
| Children in household               | 487 | 0    | 10     | 3      | 2.7   | 1.6   |
| School children                     | 454 | 0    | 10     | 2      | 2.3   | 1.4   |
| Children under 5 years              | 454 | 0    | 4      | 1      | 0.8   | 0.9   |
| Household monthly expenditure (USD) | 487 | 8.80 | 704.00 | 79.20  | 95.60 | 70.24 |
| Household landownership (ropani)    | 471 | 0    | 50     | 5      | 6.1   | 5.8   |
| Hours of water availability (h)     | 487 | 0    | 24     | 24     | 16.6  | 9.5   |

**Table S2:** Households' characteristics reported in percentage of all the households at baseline and endline.

|                                              | Baseline [%] | Endline [%] |
|----------------------------------------------|--------------|-------------|
| Ethnicity of household                       |              |             |
| Brahmin, Chhetri, Thakuri                    | 67.7         | 69.6        |
| Dalit                                        | 21.7         | 21.4        |
| Janajati                                     | 9.9          | 8.8         |
|                                              |              |             |
| Biggest concern for people living in village |              |             |
| transportation and roads                     | 16.4         | 23.4        |
| water supply                                 | 33.5         | 20.5        |
| electricity services                         | 13.4         | 18.3        |
| unemployment                                 | 5.9          | 10.1        |
| support for agriculture                      | 14.2         | 8.2         |
| education                                    | 4.1          | 6.3         |
| health and healthcare facilities             | 1.4          | 5.5         |
| sanitation and hygiene                       | 7.9          | 4.9         |
|                                              |              |             |
| Highest education of respondent              |              |             |
| primary education                            | 19.1         | 19.5        |
| secondary education                          | 16.6         | 16.6        |
| college and higher                           | 4.1          | 7.6         |
| literate                                     | 32.9         | 40          |
| illiterate                                   | 27.2         | 16.4        |
| no education                                 | 0.2          | 1.2         |
|                                              |              |             |
| Walls made of                                |              |             |
| stone and mud                                | 91.9         | 95.1        |
| stone and cement                             | 6.7          | 3.9         |
| bricks and cement                            | 0.8          | 0.6         |
| wood planks                                  | 0.6          | 0.4         |
|                                              |              |             |

|                                                                                                             | Baseline [%] | Endline [%] |
|-------------------------------------------------------------------------------------------------------------|--------------|-------------|
| Floor made of                                                                                               |              |             |
| earth                                                                                                       | 95.1         | 94.5        |
| concrete                                                                                                    | 4.9          | 5.3         |
|                                                                                                             |              |             |
| Roof made of                                                                                                |              |             |
| stone slates                                                                                                | 54           | 56          |
| corrugated galvanized iron (CGI) sheet                                                                      | 24.5         | 29.2        |
| straw                                                                                                       | 14.4         | 9.2         |
| concrete                                                                                                    | 1.6          | 2.9         |
| mud                                                                                                         | 5.5          | 2.5         |
|                                                                                                             |              |             |
| Electricity                                                                                                 |              |             |
| electric grid                                                                                               | 13.8         | 15.0        |
| solar panel                                                                                                 | 77.5         | 83.0        |
| no electricity (no grid, no panel)                                                                          | 12           | 6.4         |
|                                                                                                             |              |             |
| Food production                                                                                             |              |             |
| produce own food                                                                                            | 97.2         | 96.3        |
| don't produce food                                                                                          | 2.8          | 3.7         |
|                                                                                                             |              |             |
| Is anyone in this household involved in the water supply system in this community? (could mention multiple) |              |             |
| no                                                                                                          | 71.0         | 71.0        |
| water users' committee (WUSC) member                                                                        | 23.3         | 23.4        |
| water safety plan task force member                                                                         | 2.4          | 1.6         |
| village maintenance worker (VMW)                                                                            | 0.6          | 2.5         |
| female community health volunteer (FCHV)                                                                    | 1            | 0.2         |
|                                                                                                             |              |             |
| Water users committee meetings                                                                              |              |             |
| no answer                                                                                                   | 8.7          | 10.9        |
| never                                                                                                       | 19.5         | 12.7        |
| once a year                                                                                                 | 3            | 1.6         |
| once every half a year                                                                                      | 2            | 1.8         |
| 3 monthly                                                                                                   | 7.1          | 8.6         |
| 2 monthly                                                                                                   | 3.7          | 3.3         |
| once a month                                                                                                | 33.7         | 33.3        |

|                             | Baseline [%] | Endline [%] |
|-----------------------------|--------------|-------------|
| Main drinking water source  |              |             |
| piped village connections   | 71.2         | 71.3        |
| piped household connections | 27.0         | 26.1        |
| open source                 | 0.6          | 0.6         |
| protected source            | 0.2          | 0.8         |
| river                       | 0.2          | 0.2         |
| unmanaged piped water       | 0.8          | 0.8         |
| rainwater                   |              | 0.2         |

**Table S3:** Water system descriptions of all the systems at endline as mean, standard deviation (SD), and minimum and maximum values.

|                       | Mean | SD   | Min. | Max. |
|-----------------------|------|------|------|------|
| Households per scheme | 67.4 | 44.0 | 29   | 250  |
| Taps per scheme       | 30.8 | 43.1 | 5    | 250  |
| Reservoirs per scheme | 2.5  | 1.2  | 1    | 6    |
| Sources per scheme    | 2.3  | 1.3  | 1    | 5    |
| Households per tap    | 3.8  | 2.8  | 1    | 13   |

**Table S4:** Household characteristics of sanitary infrastructure and hygiene conditions, in percentage of households in the treatment and control systems at baseline and endline.

|                                                          | Treatment    |             | Control      |             |
|----------------------------------------------------------|--------------|-------------|--------------|-------------|
| Toilets                                                  | Baseline [%] | Endline [%] | Baseline [%] | Endline [%] |
| open defecation                                          | 0.6          | 0.0         | 1.7          | 0.6         |
| shared toilets                                           | 7.4          | 1.6         | 13.3         | 1.7         |
| simple pit latrine                                       | 11.5         | 15.9        | 20.0         | 19.6        |
| ventilated improved pit latrine                          | 80.5         | 82.5        | 65.0         | 78.2        |
|                                                          |              |             |              |             |
| Handwashing facilities                                   |              |             |              |             |
| non existing                                             | 24.3         | 17.3        | 38.3         | 30.0        |
| pour water out from bucket                               | 16.3         | 11.8        | 14.4         | 17.2        |
| drum with tap                                            | 59.4         | 51.8        | 47.2         | 36.1        |
| private tap (no option at baseline)                      |              | 17.6        |              | 16.1        |
|                                                          |              |             |              |             |
| Handwashing facilities with soap available               | 53.0         | 66.2        | 35.0         | 33.5        |
| Clean and good handwashing facilities                    | 69.0         | 79.6        | 51.7         | 48.0        |
|                                                          |              |             |              |             |
| Animal kept over night                                   |              |             |              |             |
| in same house as people living                           | 54.5         | 51.9        | 54.5         | 50.3        |
| in same house but separate floor (no option at baseline) |              | 27.9        |              | 27.9        |
| not in same house as people                              | 45.5         | 20.1        | 45.5         | 21.8        |

**Table S5:** Risk categories of the *E. coli* concentration in the control and treatment systems and the samples of the treatment systems where chlorine was measured and the ones without measured chlorine.

|                     | <b>Treatment</b> |         | <b>Control</b> |         | <b>Treatment with measured chlorine</b> |         | <b>Treatment without measured chlorine</b> |         |
|---------------------|------------------|---------|----------------|---------|-----------------------------------------|---------|--------------------------------------------|---------|
| <i>E. coli</i>      | Baseline         | Endline | Baseline       | Endline | Baseline                                | Endline | Baseline                                   | Endline |
| N                   | 313              | 308     | 179            | 180     | 19                                      | 19      | 296                                        | 289     |
| <1 CFU/100 mL       | 10.9%            | 19.8%   | 10.1%          | 7.8%    | 5.3%                                    | 78.9%   | 11.2%                                      | 15.9%   |
| 1 - 10 CFU/100 mL   | 29.4%            | 22.7%   | 28.5%          | 19.4%   | 31.6%                                   | 10.5%   | 29.3%                                      | 23.5%   |
| 11 - 100 CFU/100 mL | 36.4%            | 35.1%   | 29.6%          | 36.7%   | 42.1%                                   | 5.3%    | 36.1%                                      | 37.0%   |
| > 100 CFU/100 mL    | 23.3%            | 22.4%   | 31.8%          | 36.1%   | 21.1%                                   | 5.3%    | 23.5%                                      | 23.5%   |



**Table S6:** Spearman's correlations of functionality and users' perception, reported as spearman's rho correlation coefficient in a 2-tailed test.

|                                  |                         | Satisfaction | Availability when needed | Source functionality | Functioning in one year | Interruptions | Hours of water availability |
|----------------------------------|-------------------------|--------------|--------------------------|----------------------|-------------------------|---------------|-----------------------------|
| Availability when needed         | Correlation Coefficient | .261**       | 1.000                    | .461**               | .221**                  | -.242**       | .157**                      |
|                                  | Sig. (2-tailed)         | .000         | .                        | .000                 | .000                    | .000          | .001                        |
| Source functionality             | Correlation Coefficient | .275**       | .461**                   | 1.000                | .336**                  | -.266**       | .108*                       |
|                                  | Sig. (2-tailed)         | .000         | .000                     | .                    | .000                    | .000          | .018                        |
| Functioning in one year          | Correlation Coefficient | -.030        | .221**                   | .336**               | 1.000                   | -.210**       | .114*                       |
|                                  | Sig. (2-tailed)         | .511         | .000                     | .000                 | .                       | .000          | .012                        |
| Interruptions longer than a week | Correlation Coefficient | -.109*       | -.242**                  | -.266**              | -.210**                 | 1.000         | -.127**                     |
|                                  | Sig. (2-tailed)         | .017         | .000                     | .000                 | .000                    | .             | .005                        |
| Hours of water availability      | Correlation Coefficient | .059         | .157**                   | .108*                | .114*                   | -.127**       | 1.000                       |
|                                  | Sig. (2-tailed)         | .196         | .001                     | .018                 | .012                    | .005          | .                           |

\*\* . Correlation is significant at the 0.01 level (2-tailed).

\* . Correlation is significant at the 0.05 level (2-tailed).

**Table S7:** Condition of transportation and storage container, in percentage of households in the treatment and control systems at baseline and endline.

|                               | <b>Treatment</b> |             | <b>Control</b> |             |
|-------------------------------|------------------|-------------|----------------|-------------|
|                               | Baseline [%]     | Endline [%] | Baseline [%]   | Endline [%] |
| Transport container clean     | 77.6             | 93.0        | 75.4           | 64.3        |
| Transport container lid       | 60.7             | 79.0        | 54.1           | 54.8        |
| Transport container broken    | 2.8              | 7.0         | 4.9            | 9.5         |
|                               |                  |             |                |             |
| Storage container clean       | 79.4             | 94.0        | 75.4           | 59.5        |
| Storage container broken      | 18.7             | 10.0        | 16.4           | 2.4         |
| Storage container lid present | 69.0             | 73.7        | 55.0           | 59.8        |

**Table S8:** Construct of the binary comparison of the independent variables with the *E. coli* concentration at endline as basis for the ordinal logistic regression model

| IV Category                       | General Construct                   | Specific Indicator(s)                                                                                                                   |                                                    | Variable type     | Spearman's correlation  |        | Mann Whitney |       |
|-----------------------------------|-------------------------------------|-----------------------------------------------------------------------------------------------------------------------------------------|----------------------------------------------------|-------------------|-------------------------|--------|--------------|-------|
|                                   |                                     |                                                                                                                                         |                                                    |                   | Correlation coefficient | p      | Z            | p     |
| Independent variables of Interest | Received REACH broad intervention   | Household enrolment group (1=treatment, 0=control)                                                                                      |                                                    | Binary            | -0.180                  | < .001 | -3.982       | 0.000 |
|                                   | Received chlorination through REACH | Intended chlorination (1=yes, 0=no)                                                                                                     |                                                    | Continuous        | -0.247                  | < .001 | -5.952       | 0.000 |
|                                   |                                     | Measured chlorine at EL                                                                                                                 |                                                    | Ordinal           | -0.247                  | < .001 |              |       |
|                                   | Received REACH WASH Promotion       | Measured chlorine in categories<br>0 = no chlorine detected<br>1= chlorine concentration <0.2mg/L<br>2= chlorine concentration >0.2mg/L |                                                    |                   |                         |        |              |       |
|                                   |                                     | - Info received (1=yes, 0=no)                                                                                                           | 64.9% yes                                          | Binary            | 0.048                   | 0.293  | -1.053       | 0.292 |
|                                   |                                     | - Perception of water safety (1=safe, 5=very risky)                                                                                     |                                                    | Ordinal           | -0.007                  | 0.886  |              |       |
|                                   |                                     | - WASH Awareness: Knowledge of chance of getting sick when drinking untreated water                                                     |                                                    | Ordinal           | -0.036                  | 0.428  |              |       |
|                                   | Household water treatment           | Practicing water treatment at household level (1=yes, 0=no)                                                                             | 54.8% yes                                          | Binary            | -0.030                  | 0.503  | -0.671       | 0.502 |
|                                   | Safe storage                        | Storage container lid present (1=yes, 0=no)                                                                                             | 68.6% yes                                          | Binary            | -0.103                  | 0.023  | -2.274       | 0.023 |
|                                   | Hand hygiene practices              | Hand washing facilities soap available (1=yes, 0=no)                                                                                    | 69.7% yes                                          | Binary            | -0.133                  | 0.010  | -2.575       | 0.010 |
|                                   | Functionality of the water system   | - Interruption longer than one week within the last 6 months (1=yes, 0=no)                                                              | 16.2% yes                                          | Binary            | -0.051                  | 0.261  | -1.125       | 0.260 |
|                                   |                                     | - Interruption longer than one day within the last 6 months (1=yes, 0=no)                                                               | 26.3% yes                                          | Binary            | -0.071                  | 0.131  | -1.512       | 0.130 |
|                                   |                                     | - Current functionality (1 = no, 2 = yes, but not so well, 3 = yes well)                                                                | 88.7% yes well<br>10.5% yes not so well<br>0.8% no | Ordinal           | -0.036                  | 0.425  |              |       |
|                                   |                                     | - Confidence that system will be functional in 1 year                                                                                   | 1: 3.3%<br>2: 12.5%<br>3: 20.5%                    | Ordinal           | -0.069                  | 0.130  |              | -     |
|                                   |                                     |                                                                                                                                         |                                                    | Binary (1,2,3 =0; | -0.086                  | 0.059  | -1.886       | 0.059 |

# Supplemental Material

|                                    |                           |                                                                                                                                                                          |                                                                  |                                                                                           |                                                  |                                              |                                                |                                           |
|------------------------------------|---------------------------|--------------------------------------------------------------------------------------------------------------------------------------------------------------------------|------------------------------------------------------------------|-------------------------------------------------------------------------------------------|--------------------------------------------------|----------------------------------------------|------------------------------------------------|-------------------------------------------|
|                                    |                           | (1 = not at all, 5 = very)                                                                                                                                               | 4: 39.4%<br>5: 24.2%                                             | 4,5=1)<br>Binary<br>(1,2 = 0;<br>3,4,5 = 1)                                               | -0.090                                           | 0.046                                        | -1.994                                         | 0.046                                     |
|                                    | Maintenance and repair    | - Confidence that problem is fixed within 1 week<br>0=no answer<br>1=not at all confident<br>2=somewhat confident<br>3=very confident<br><br>- VMW exists (1=yes, 0=no). | 1.4%<br>13.8%<br>45.6%<br>39.2%<br><br>78.6% yes                 | Ordinal<br><br>Binary<br>(1 = 0;<br>2,3 = 1)<br><br>Binary (1,2 = 0; 3 = 1)<br><br>Binary | -0.031<br><br>-0.023<br><br>-0.033<br><br>-0.051 | 0.502<br><br>0.615<br><br>0.472<br><br>0.260 | -0.504<br><br>-0.720<br><br>-1.126             | 0.614<br><br>0.471<br><br>0.260           |
|                                    | Intermittent water supply | Hours of water available at the tap per day<br>0= intermittent (<=12h)<br>1= continuous (>12h)                                                                           | Exact hours<br><br>62% continuous                                | Continuous<br><br>Binary                                                                  | -0.087<br><br>-0.082                             | 0.055<br><br>0.071                           | -1.807                                         | 0.071                                     |
| <b>Other independent variables</b> | Household size            | Number of HH members                                                                                                                                                     |                                                                  | Continuous                                                                                | 0.087                                            | 0.056                                        |                                                |                                           |
|                                    | Children present in home  | Children < 5 years living in the HH (1=yes, 0=no)                                                                                                                        | 57.7% yes                                                        | Binary                                                                                    | 0.082                                            | 0.071                                        | -1.876                                         | 0.061                                     |
|                                    | Education level           | Interviewees highest level of education: primary or higher (1=yes, 0=no)                                                                                                 | 42.3% yes                                                        | Binary                                                                                    | 0.029                                            | 0.518                                        | -0.647                                         | 0.518                                     |
|                                    | Wealth level              | Amount of typical regular monthly expenditure                                                                                                                            |                                                                  | Continuous                                                                                | -0.094                                           | 0.039                                        |                                                |                                           |
|                                    | Housing type              | Floor material earth used (1=yes, 0=no)                                                                                                                                  | 94.5% yes                                                        | Binary                                                                                    | 0.049                                            | 0.282                                        | -1.077                                         | 0.282                                     |
|                                    | Sanitation                | Is toilet clean (1=yes, 0=no)                                                                                                                                            | 68.5% yes                                                        | Binary                                                                                    | -0.034                                           | 0.452                                        | -0.754                                         | 0.451                                     |
|                                    | Animal faeces             | Animal sleeping in house:<br><br>0= no, 1 = yes and yes but on separate floor                                                                                            | 20.7% no, 51.3% yes but separate floor<br>27.9% yes<br>79.2% → 1 | Ordinal<br><br>Binary                                                                     | 0.086<br><br>0.080                               | 0.058<br><br>0.076                           | -1.775                                         | 0.076                                     |
|                                    | District                  | V1: Achham = y/n<br>V2: Dailekh = y/n<br>V3: Jajarkot = y/n<br>V4: Kalikot = y/n<br>V5: Surkhet = y/n                                                                    | 24.3%<br>18.3%<br>19.9%<br>21.1%<br>15.2%                        | All binary                                                                                | 0.157<br>0.012<br>-0.077<br>0.048<br>-0.174      | < .001<br>0.798<br>0.089<br>0.292<br>0.000   | -3.466<br>-0.256<br>-1.701<br>-1.054<br>-3.839 | 0.001<br>0.798<br>0.089<br>0.292<br>0.000 |

**Table S9:** Ordinal logistic regression model including upper and lower boundary of the log odds and the odds ratio. Endline *E. coli* risk categories are: 0 = <1 CFU/100 mL (non-detect); 1 = 1-10 CFU/100 mL; 2 = 11-100 CFU/100 mL; and 3 = >100 *E. coli* CFU/100 mL (reference category).

| Variable                                                                               | Estimate<br>(log odds) | Std. Error | Wald   | df | Sig.  | 95% CI      |             | Exp(B)<br>(OR) | 95% CI      |             |
|----------------------------------------------------------------------------------------|------------------------|------------|--------|----|-------|-------------|-------------|----------------|-------------|-------------|
|                                                                                        |                        |            |        |    |       | Lower limit | Upper limit |                | Lower limit | Upper limit |
| Endline <i>E. coli</i> risk category= 0                                                | -2.460                 | 0.543      | 20.548 | 1  | 0.000 | -3.524      | -1.397      | 0.085          | 0.029       | 0.247       |
| Endline <i>E. coli</i> risk category= 1                                                | -1.117                 | 0.532      | 4.413  | 1  | 0.036 | -2.159      | -0.075      | 0.327          | 0.115       | 0.928       |
| Endline <i>E. coli</i> risk category= 2                                                | 0.561                  | 0.530      | 1.121  | 1  | 0.290 | -0.477      | 1.598       | 1.752          | 0.620       | 4.945       |
| Treatment scheme (yes = 1, no = 0)                                                     | -0.619                 | 0.197      | 9.930  | 1  | 0.002 | -1.004      | -0.234      | 0.538          | 0.366       | 0.791       |
| Measured chlorine concentration (mg/L)                                                 | -3.491                 | 1.178      | 8.782  | 1  | 0.003 | -5.800      | -1.182      | 0.030          | 0.003       | 0.307       |
| WASH information received (yes = 1, no = 0)                                            | 0.301                  | 0.204      | 2.172  | 1  | 0.141 | -0.099      | 0.702       | 1.351          | 0.905       | 2.017       |
| Practicing household water treatment (yes = 1, no = 0)                                 | 0.275                  | 0.229      | 1.439  | 1  | 0.230 | -0.174      | 0.725       | 1.317          | 0.840       | 2.065       |
| Presence of lid on storage container (yes = 1, no = 0)                                 | -0.444                 | 0.231      | 3.696  | 1  | 0.055 | -0.897      | 0.009       | 0.641          | 0.408       | 1.009       |
| Confidence of functionality in one year (5 = very confident, 1 = not confident at all) | -0.281                 | 0.248      | 1.285  | 1  | 0.257 | -0.767      | 0.205       | 0.755          | 0.464       | 1.227       |
| Confidence of problem fixed in one week (5 = very confident, 1 = not confident at all) | 0.077                  | 0.184      | 0.174  | 1  | 0.676 | -0.283      | 0.436       | 1.080          | 0.753       | 1.547       |
| Hand washing facilities with soap available (yes = 1, no = 0)                          | -0.144                 | 0.219      | 0.431  | 1  | 0.512 | -0.574      | 0.286       | 0.866          | 0.563       | 1.331       |
| Hours of water availability (hours)                                                    | -0.009                 | 0.009      | 0.872  | 1  | 0.350 | -0.027      | 0.010       | 0.991          | 0.973       | 1.010       |
| Number of people in household                                                          | 0.043                  | 0.038      | 1.289  | 1  | 0.256 | -0.031      | 0.118       | 1.044          | 0.969       | 1.125       |
| Presence of children under 5 years (yes = 1, no = 0)                                   | 0.158                  | 0.184      | 0.733  | 1  | 0.392 | -0.203      | 0.519       | 1.171          | 0.816       | 1.681       |
| Monthly expenditure (USD)                                                              | -0.001                 | 0.001      | 0.218  | 1  | 0.641 | -0.003      | 0.002       | 1.209          | 0.853       | 1.715       |
| Respondent completed primary or higher education (yes = 1, no = 0)                     | 0.190                  | 0.178      | 1.138  | 1  | 0.286 | -0.159      | 0.539       | 0.999          | 0.997       | 1.002       |
| Toilet clean (yes = 1, no = 0)                                                         | -0.029                 | 0.208      | 0.020  | 1  | 0.888 | -0.436      | 0.378       | 0.971          | 0.647       | 1.459       |
| Animal in same house overnight (yes = 1, no = 0)                                       | 0.286                  | 0.249      | 1.326  | 1  | 0.250 | -0.201      | 0.774       | 1.332          | 0.818       | 2.168       |
| Achham_yes_no                                                                          | 0.210                  | 0.280      | 0.563  | 1  | 0.453 | -0.339      | 0.759       | 1.234          | 0.713       | 2.137       |
| Jajarkot_yes_no                                                                        | -0.642                 | 0.325      | 3.915  | 1  | 0.048 | -1.278      | -0.006      | 0.526          | 0.279       | 0.994       |
| Kalikot_yes_no                                                                         | -0.397                 | 0.313      | 1.602  | 1  | 0.206 | -1.011      | 0.218       | 0.672          | 0.364       | 1.243       |
| Surkhet_yes_no                                                                         | -0.882                 | 0.330      | 7.126  | 1  | 0.008 | -1.529      | -0.234      | 0.414          | 0.217       | 0.791       |
